# Supplementary material for: Two-dimensional spatiotemporal Fourier transform with femtosecond pulses for on-chip devices
Source: Research Square preprint supplement (doi:10.21203/rs.3.rs-131513/v1), 2021-01-27
Supplement: Supplementary file 1 [file 5c4d3bba219ffc8f9abcb870.docx]

Supplementary Information for

**Two-dimensional spatiotemporal Fourier transform with femtosecond pulses for on-chip devices**

Yulong Wang, Changjun Min*, Yuquan Zhang, Xiaocong Yuan†

*Nanophotonics Research Centre, Shenzhen Key Laboratory of Micro-Scale Optical Information Technology & Institute of Microscale Optoelectronics, Shenzhen University, Shenzhen 518060, China*

**cjmin@szu.edu.cn, †xcyuan@szu.edu.cn*

**Supplementary Note 1**

**The dependence of the spatiotemporal FT effects on the radius *R* in the case of angular dispersion (*θ* =10°).**

Figures S1 show the influence of *R* on the space-time focusing properties of the SPP pulse. When the radius is small (*R* =10 μm), the SPP pulse converges along the upper right direction (*t* =−6.7 fs) before diverges along the lower right direction (*t* =6.7 fs), and forms a slightly tilted focus at *t* =0 fs [Figure S1(a)]. Due to the relatively small radius, the excited SPP pulse has a short propagation distance, making the accumulated dispersion effect very small, resulting in the insignificant spatiotemporal differences of different frequency components in the focal plane. Therefore, when the radius increases (*R* =25 μm), the wavefront of the SPP pulse appears as a curved arc at different times, and the direction of its bending greatly rotates with time [Figure S1(b)], and forming an inverted C shape at *t* =0 fs. When the radius is further increased, such as *R*=40 μm, sufficient dispersion effects are accumulated during the propagation of the SPP pulse, so that the instantaneous wavefront is bent into a ring [Fig. 2(l)]. Meaning that the propagation path of the SPP pulse can be effectively modulated by changing the radius of the arc.


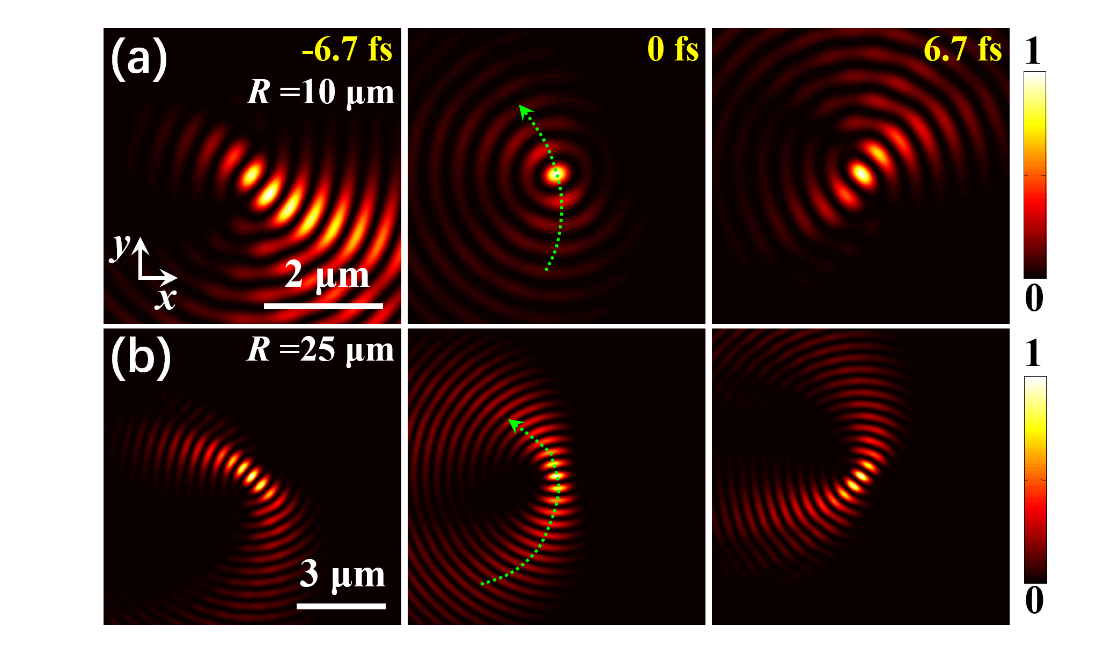


**Figure S1** The dependence of the spatiotemporal FT effects on the radius *R* in the case of angular dispersion (*θ* =10°). **a** *R* =10 μm, *α* =180°, *τ* =10 fs. **b** same as (**a**) except *R* =25 μm. The green arrow indicates the direction of propagation path of the SPP pulses at the elapsed time given in the top right corner.

**Supplementary Note 2**

**The dependence of the spatiotemporal FT effects on the arc measure *α* in the case of angular dispersion (*θ* =10°).**

Figures S2 show the influence of ***α*** on the space-time focusing properties of the SPP pulse. The wavefront of the SPP pulse always remains bend to the left with time, except for the changes in the height of the head and tail [Figure S2]. Compared with Fig. 2(l), it can be found that as *α* decreases, the spatiotemporal curvature of the SPP pulse in the focal region decreases accordingly, especially at *t*=0 fs, the SPP pulse degenerates from a ring to inverted C shape. This is because the tightly focused SPP pulse gradually becomes weakly focused as *α* decreases, leading to the increase of focal depth. Proving that the arc measure may has a great influence on the spatiotemporal FT effect of the SPP pulse.


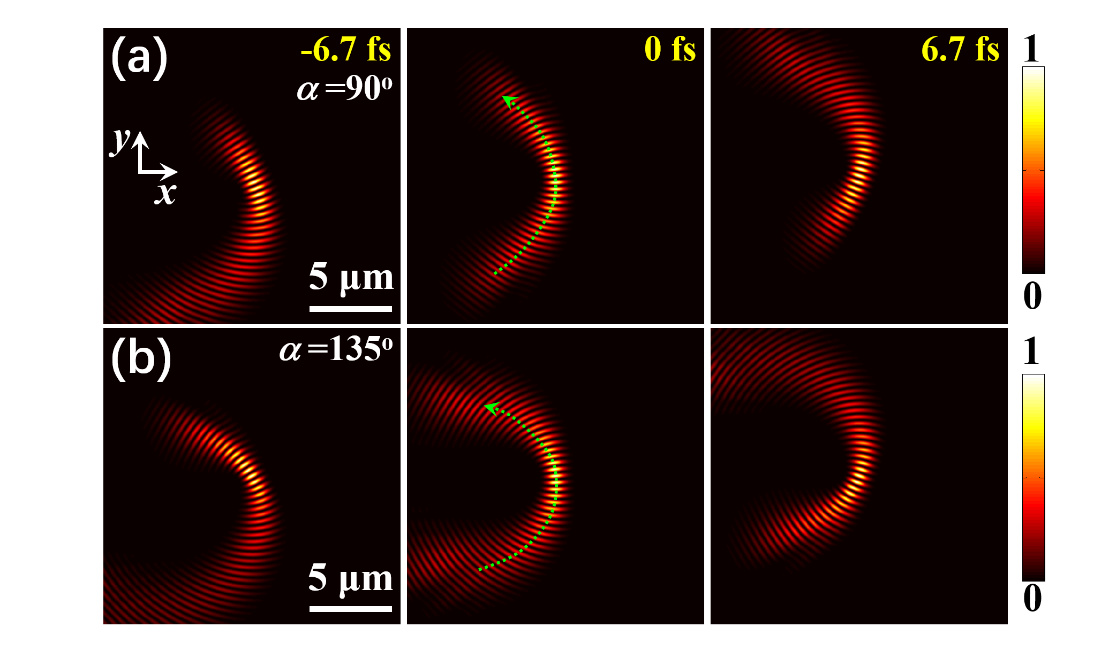


**Figure S2** The dependence of the spatiotemporal FT effects on the arc measure *α* in the case of angular dispersion (*θ* =10°). **a** *R* =40 μm, *α* =90o, *τ* =10 fs. **b** same as (**a**) except *α* =135°. The green arrow indicates the direction of propagation path of the SPP pulses at the elapsed time given in the top right corner.

**Supplementary Note 3**

**The dependence of the spatiotemporal FT effects on the pulse durations *τ* in the case of angular dispersion (*θ* =10°).**

We also further analyzed the ultrafast spatiotemporal FT process of SPP pulses excited by light sources with different pulse durations *τ* [Figures S3]. The SPP pulse excited by a light source with a shorter pulse duration (*τ* =5 fs) shows a spiral shape (*t* =-3.4 fs), and then forms a ring at *t* =0 fs [Figure S3(a)], and further evolves into another spiral with opposite rotation directions (*t* =3.4 fs). However, when excited by a longer pulse (*τ* =20 fs), the instantaneous ring-shape disappears, except a slightly bended propagation path [Figure S3(b)]. Compared with Fig. 2(l), we found that the shorter the pulse duration, the more severely the propagation path is bent. Because, the excitation light source has more sufficient frequency components, which equivalently amplifies the dispersion effect of the SPP pulses. Proving that the spatiotemporal FT effect of the SPP pulse is also affected by the pulse duration of the incident light source.


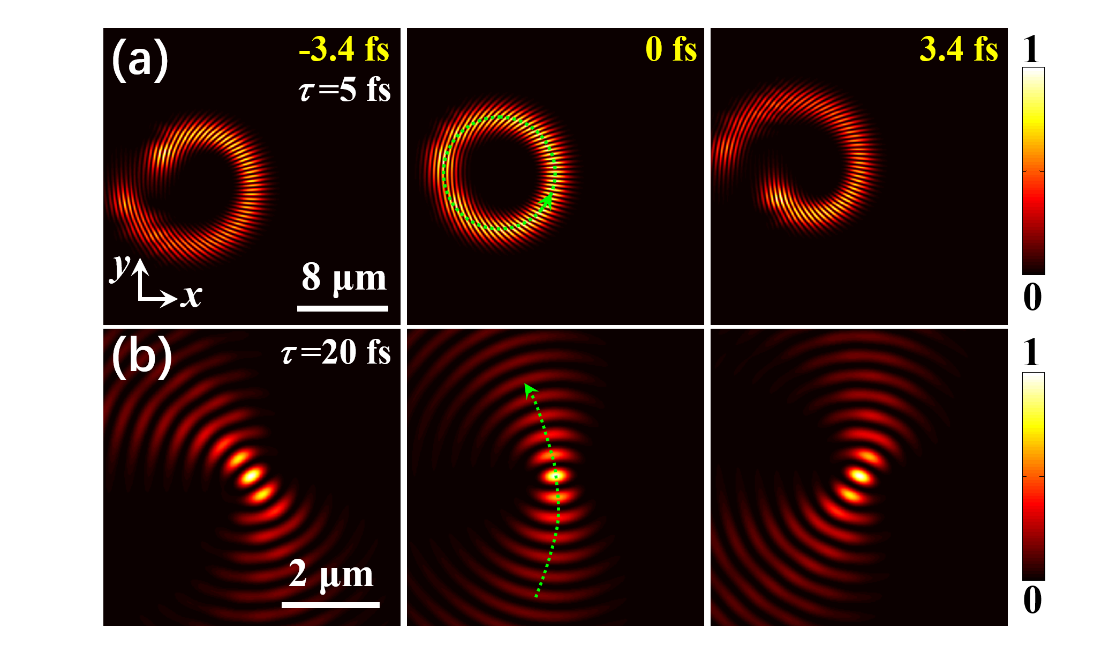


**Figure S3** The dependence of the spatiotemporal FT effects on the pulse duration *τ* in the case of angular dispersion (*θ* =10°). **a** *R* =40 μm, *α*=180°, *τ* =5 fs. **b** same as (**a**) except *τ* =20 fs. The green arrow indicates the direction of propagation path of the SPP pulses at the elapsed time given in the top right corner.

Therefore, the propagation path of the SPP pulse and its spatiotemporal FT effect can be flexibly modulated by changing these parameters, which provides new ideas for the application of on-chip optical pulse spatiotemporal modulation, beam steering, and photon information processing.

**Supplementary Note 4**

Supplementary Movie 1 to Movie 3 show the ultrafast evolution of the SPP pulse in the focal region subject to different dispersion corresponding to Fig.2 (e), (h) and (k), respectively. Movie 1:*θ* = 0°; Movie 2: *θ* = 5°; Movie 3: *θ* = 10°.

Supplementary Movie 4 to Movie 7 show the ultrafast evolving of the SPP-Airy pulse in the focal region subject to non-dispersion (Movie 4 and Movie 5) and dispersion (Movie 6 and Movie 7) corresponding to Figs.3 (c)-(f), respectively. (Movie 4 and **6**) presents analytical results and (Movie 5 and Movie 7) presents 3D-FDTD simulation results.
